# Supplementary material
Source: MDPI journal article supplement (https://www.mdpi.com/1424-2818/13/11/587)
Supplement: s1 [file s1]

**Table S1.** The coordinated and elevation of the studied stands along Wadi Hargan, Saudi Arabia.

| Stands | N         | E         | Elevation (m.a.s.l.) |
|--------|-----------|-----------|----------------------|
| 1      | 25°03.975 | 46°10.802 | 824                  |
| 2      | 25°03.972 | 46°10.815 | 822                  |
| 3      | 25°03.944 | 46°10.824 | 816                  |
| 4      | 25°03.923 | 46°10.852 | 812                  |
| 5      | 25°03.890 | 46°10.897 | 810                  |
| 6      | 25°03.842 | 46°10.882 | 811                  |
| 7      | 25°03.884 | 46°10.993 | 806                  |
| 8      | 25°03.856 | 46°11.108 | 803                  |
| 9      | 25°03.880 | 46°11.246 | 803                  |
| 10     | 25°03.871 | 46°11.362 | 804                  |
| 11     | 25°03.859 | 46°11.488 | 806                  |
| 12     | 25°03.727 | 46°11.649 | 804                  |
| 13     | 25°03.725 | 46°11.770 | 797                  |
| 14     | 25°03.719 | 46°11.972 | 797                  |
| 15     | 25°03.742 | 46°12.157 | 797                  |

**Table S2.** The floristic analysis of the recorded plant species in the study area.

| Species                                           | Family         | Life Span | Life Form       | Chorotype                            |
|---------------------------------------------------|----------------|-----------|-----------------|--------------------------------------|
| <i>Aaronsohnia factorovskyi</i> Warb. & Eig       | Asteraceae     | Annual    | Therophyte      | Saharo-Arabian                       |
| <i>Acacia ehrenbergiana</i> Hayne                 | Fabaceae       | Perennial | Phanerophytes   | Saharo-Arabian Sudano-Zambezian      |
| <i>Acacia gerrardii</i> Benth.                    | Fabaceae       | Perennial | Phanerophyte    | Sudanian-African                     |
| <i>Acacia tortilis</i> (Forssk.) Hayne            | Mimosaceae     | Perennial | Phanerophyte    | Sudanian                             |
| <i>Achillea fragrantissima</i> (Forssk.) Sch.Bip. | Asteraceae     | Perennial | Hemicryptophyte | Irano-Turanian - Saharo-Arabian      |
| <i>Adiantum capillus-veneris</i> L.               | Adiantaceae    | Perennial | Hemicryptophyte | Euro-Siberian - Med - Irano-Turanian |
| <i>Aeluropus lagopoides</i> (L.) Thwaites         | Poaceae        | Perennial | Hemicryptophyte | Irano-Turanian - Saharo-Arabian      |
| <i>Alhagi graecorum</i> Boiss.                    | Papilionaceae  | Perennial | Hemicryptophyte | Med - Irano-Turanian                 |
| <i>Anagallis arvensis</i> L.                      | Primulaceae    | Annual    | Therophyte      | Euro-Siberian - Med - Irano-Turanian |
| <i>Anisosciadium lanatum</i> Boiss.               | Apiaceae       | Annual    | Therophyte      | Saharo-Arabian                       |
| <i>Anthemis deserti</i> Boiss.                    | Asteraceae     | Annual    | Therophyte      | Saharo-Arabian                       |
| <i>Anvillea garcinii</i> (Burm.f.) DC.            | Asteraceae     | Annual    | Chamaephyte     | Saharo-Arabian                       |
| <i>Artemisia monosperma</i> Delile                | Asteraceae     | Perennial | Chamaephyte     | Saharo-Arabian                       |
| <i>Artemisia pycnocephala</i> (Less.) DC.         | Asteraceae     | Perennial | Chamaephyte     | Saharo-Arabian                       |
| <i>Artemisia sieberi</i> Besser                   | Asteraceae     | Perennial | Chamaephyte     | Irano-Turanian                       |
| <i>Asphodelus tenuifolius</i> Cav.                | Liliaceae      | Annual    | Therophyte      | Saharo-Arabian - Sudanian            |
| <i>Asteriscus pygmaeus</i> (DC.) Coss. & Durieu   | Asteraceae     | Annual    | Therophyte      | Mediterranean                        |
| <i>Astragalus spinosus</i> (Forssk.) Muschl.      | Papilionaceae  | Perennial | Chamaephyte     | Irano-Turanian                       |
| <i>Atriplex leucoclada</i> Boiss.                 | Chenopodiaceae | Perennial | Chamaephyte     | Irano-Turanian - Saharo-Arabian      |
| <i>Avena sterilis</i> L.                          | Poaceae        | Annual    | Therophyte      | Med - Irano-Turanian                 |
| <i>Bassia eriophora</i> (Schrad.) Asch.           | Chenopodiaceae | Annual    | Therophyte      | Saharo-Arabian - Sudanian            |

|                                                            |                 |           |                 |                                       |
|------------------------------------------------------------|-----------------|-----------|-----------------|---------------------------------------|
| <i>Blepharis ciliaris</i> (L.) B.L.Burt                    | Acanthaceae     | Perennial | Chamaephyte     | Irano-Turanian - Saharo-Arabian       |
| <i>Calendula tripterocarpa</i> Rupr.                       | Asteraceae      | Annual    | Therophyte      | Saharo-Arabian                        |
| <i>Cenchrus ciliaris</i> L.                                | Poaceae         | Perennial | Chamaephyte     | Saharo-Arabian                        |
| <i>Chenopodium murale</i> L.                               | Chenopodiaceae  | Annual    | Therophyte      | Plurireginalbor-trop                  |
| <i>Citrullus colocynthis</i> (L.) Schrad.                  | Cucurbitaceae   | Perennial | Hemicryptophyte | Saharo-Arabian                        |
| <i>Cucumis prophetarum</i> L.                              | Cucurbitaceae   | Perennial | Hemicryptophyte | Saharo-Arabian                        |
| <i>Cuscuta planiflora</i> Ten.                             | Convolvulaceae  | Annual    | Parasite        | Med - Saharo-Arabian                  |
| <i>Cymbopogon commutatus</i> (Steud.) Stapf                | Poaceae         | Perennial | Hemicryptophyte | Saharo-Arabian                        |
| <i>Cynodon dactylon</i> (L.) Pers.                         | Poaceae         | Perennial | Hemicryptophyte | Plurireginalbor-trop                  |
| <i>Diploaxis acris</i> (Forssk.) Boiss.                    | Brassicaceae    | Annual    | Therophyte      | Saharo-Arabian                        |
| <i>Diploaxis harra</i> (Forssk.) Boiss.                    | Brassicaceae    | Annual    | Chamaephyte     | Saharo-Arabian                        |
| <i>Ducrosia anethifolia</i> (DC.) Boiss.                   | Apiaceae        | Annual    | Hemicryptophyte | Irano-Turanian                        |
| <i>Echinops spinosus</i> L.                                | Asteraceae      | Perennial | Chamaephyte     | Mediterranean                         |
| <i>Eclipta prostrata</i> (L.) L.                           | Asteraceae      | Annual    | Therophyte      | Subtropical -Tropical                 |
| <i>Emex spinosa</i> (L.) Campd.                            | Polygonaceae    | Annual    | Therophyte      | Mediterranean                         |
| <i>Ephedra foliata</i> Boiss. ex C.A.Mey.                  | Ephedraceae     | Perennial | Phanerophyte    | Sudanian                              |
| <i>Eragrostis minor</i> Host                               | Poaceae         | Annual    | Therophyte      | Euro-Siberian - Med - Irano-Turanian  |
| <i>Erodium laciniatum</i> (Cav.) Willd.                    | Geraniaceae     | Annual    | Therophyte      | Mediterranean                         |
| <i>Euphorbia prostrata</i> Aiton                           | Euphorbiaceae   | Annual    | Therophyte      | Med - Irano-Turanian                  |
| <i>Fagonia bruguieri</i> DC.                               | Zygophyllaceae  | Perennial | Chamaephyte     | Saharo-Arabian                        |
| <i>Farsetia aegyptia</i> Turra                             | Brassicaceae    | Perennial | Chamaephyte     | Sudanian                              |
| <i>Ficus salicifolia</i> Vahl                              | Moraceae        | Perennial | Phanerophyte    | Sudanian                              |
| <i>Filago desertorum</i> Pomel                             | Asteraceae      | Annual    | Therophyte      | Irano-Turanian - Saharo-Arabian       |
| <i>Frankenia pulverulenta</i> L.                           | Frankeniaceae   | Annual    | Therophyte      | Euro-Siberian - Med - Irano-Turanian  |
| <i>Gymnocarpus decandrus</i> Forssk.                       | Caryophyllaceae | Perennial | Chamaephyte     | Saharo-Arabian                        |
| <i>Haloxylon salicornicum</i> (Moq.) Bunge ex Boiss.       | Chenopodiaceae  | Perennial | Chamaephyte     | Sudanian                              |
| <i>Helianthemum lippii</i> (L.) Dum.Cours.                 | Cistaceae       | Perennial | Chamaephyte     | Saharo-Arabian - Sudanian             |
| <i>Heliotropium ramosissimum</i> (Lehm.) Sieber ex DC.     | Boraginaceae    | Annual    | Therophyte      | Saharo-Arabian - Sudanian             |
| <i>Hordeum murinum</i> L.                                  | Poaceae         | Annual    | Therophyte      | Med - Irano-Turanian                  |
| <i>Hyparrhenia hirta</i> (L.) Stapf                        | Poaceae         | Perennial | Hemicryptophyte | Med - Irano-Turanian - Saharo-Arabian |
| <i>Ifloga ruepellii</i> (L.) Druce                         | Asteraceae      | Annual    | Therophyte      | Saharo-Arabian                        |
| <i>Ifloga spicata</i> (Forssk.) Sch.Bip.                   | Asteraceae      | Annual    | Therophyte      | Saharo-Arabian                        |
| <i>Juncus rigidus</i> Desf.                                | Juncaceae       | Perennial | Geophytes       | Irano-Turanian - Saharo-Arabian       |
| <i>Koelpinia linearis</i> Pall.                            | Asteraceae      | Annual    | Therophyte      | Irano-Turanian - Saharo-Arabian       |
| <i>Launaea angustifolia</i> (Desf.) Kuntze                 | Asteraceae      | Annual    | Therophyte      | Saharo-Arabian                        |
| <i>Launaea capitata</i> (Spreng.) Dandy                    | Asteraceae      | Annual    | Therophyte      | Saharo-Arabian                        |
| <i>Launaea mucronata</i> (Forssk.) Muschl.                 | Asteraceae      | Annual    | Therophyte      | Saharo-Arabian                        |
| <i>Lolium multiflorum</i> Lam.                             | Poaceae         | Annual    | Hemicryptophyte | Euro-Siberian - Med - Irano-Turanian  |
| <i>Lomelosia porphyraeura</i> (Blakelock) Greuter & Burdet | Dipsacaceae     | Annual    | Therophyte      | Irano-Turanian - Saharo-Arabian       |

|                                                             |                  |           |                 |                                       |
|-------------------------------------------------------------|------------------|-----------|-----------------|---------------------------------------|
| <i>Lycium shawii</i> Roem. & Schult.                        | Solanaceae       | Perennial | Phanerophyte    | Saharo-Arabian - Sudanian             |
| <i>Malva parviflora</i> L.                                  | Malvaceae        | Annual    | Therophyte      | Med - Irano-Turanian                  |
| <i>Matthiola longipetala</i> (Vent.) DC.                    | Brassicaceae     | Annual    | Therophyte      | Med - Irano-Turanian                  |
| <i>Medicago laciniata</i> (L.) Mill.                        | Papilionaceae    | Annual    | Therophyte      | Saharo-Arabian                        |
| <i>Moricandia sinaica</i> (Boiss.) Boiss.                   | Brassicaceae     | Perennial | Chamaephyte     | Saharo-Arabian                        |
| <i>Ochradenus baccatus</i> Delile                           | Resedaceae       | Perennial | Phanerophyte    | Sudanian-African                      |
| <i>Panicum turgidum</i> Forssk.                             | Poaceae          | Perennial | Chamaephyte     | Saharo-Arabian - Sudanian             |
| <i>Paronychia arabica</i> (L.) DC.                          | Caryophyllaceae  | Annual    | Hemicryptophyte | Saharo-Arabian                        |
| <i>Pennisetum divisum</i> (Forssk. ex J.F.Gmel.)<br>Henrard | Poaceae          | Perennial | Chamaephyte     | Saharo-Arabian                        |
| <i>Pergularia tomentosa</i> L.                              | Asclepiadaceae   | Perennial | Chamaephyte     | Sudanian                              |
| <i>Phalaris minor</i> Retz.                                 | Poaceae          | Annual    | Ephemeral       | Med - Irano-Turanian                  |
| <i>Phoenix dactylifera</i> L.                               | Arecaceae        | Perennial | Phanerophyte    | Saharo-Arabian                        |
| <i>Phragmites australis</i> (Cav.) Trin. ex Steud.          | Poaceae          | Perennial | Hemicryptophyte | Plurireginalbor-trop                  |
| <i>Picris babylonica</i> Hand.-Mazz.                        | Asteraceae       | Annual    | Therophyte      | Saharo-Arabian                        |
| <i>Picris cyanocarpa</i> Boiss.                             | Asteraceae       | Annual    | Therophyte      | Saharo-Arabian                        |
| <i>Plantago ciliata</i> Desf.                               | Plantaginaceae   | Annual    | Therophyte      | Saharo-Arabian                        |
| <i>Plantago coronopus</i> L.                                | Plantaginaceae   | Annual    | Therophyte      | Euro-Siberian - Med - Irano-Turanian  |
| <i>Plantago ovata</i> Forssk.                               | Plantaginaceae   | Annual    | Therophyte      | Irano-Turanian - Saharo-Arabian       |
| <i>Polygonum equisetiforme</i> Sm.                          | Polygonaceae     | Perennial | Hemicryptophyte | Med - Saharo-Arabian                  |
| <i>Polypogon monsepliensis</i> (L.) Desf.                   | Poaceae          | Annual    | Ephemeral       | Med - Irano-Turanian - Saharo-Arabian |
| <i>Polytrichum juniperinum</i> Hedw.                        | Polytrichaceae   |           |                 | Saharo-Arabian                        |
| <i>Prosopis farcta</i> (Banks & Sol.) J.F.Macbr.            | Mimosaceae       | Perennial | Phanerophyte    | Irano-Turanian                        |
| <i>Pulicaria undulata</i> (L.) C.A.Mey.                     | Asteraceae       | Perennial | Chamaephyte     | Saharo-Arabian - Sudanian             |
| <i>Reichardia tingitana</i> (L.) Roth                       | Asteraceae       | Annual    | Therophyte      | Med - Irano-Turanian                  |
| <i>Reseda muricata</i> C.Presl                              | Resedaceae       | Perennial | Chamaephyte     | Saharo-Arabian                        |
| <i>Rhanterium epapposum</i> Oliv.                           | Asteraceae       | Perennial | Chamaephyte     | Saharo-Arabian                        |
| <i>Rhazya stricta</i> Decne.                                | Apocynaceae      | Perennial | Phanerophyte    | Saharo-Arabian - Sudanian             |
| <i>Rumex vesicarius</i> L.                                  | Polygonaceae     | Annual    | Therophyte      | Saharo-Arabian                        |
| <i>Salvia spinosa</i> L.                                    | Lamiaceae        | Annual    | Hemicryptophyte | Irano-Turanian                        |
| <i>Savignya parviflora</i> (Delile) Webb                    | Brassicaceae     | Annual    | Therophyte      | Saharo-Arabian                        |
| <i>Schismus barbatus</i> (L.) Thell.                        | Poaceae          | Annual    | Ephemeral       | Irano-Turanian - Saharo-Arabian       |
| <i>Scirpoides holoschoenus</i> (L.) Soják                   | Cyperaceae       | Perennial | Helophyte       | Med - Irano-Turanian                  |
| <i>Sclerocephalus arabicus</i> Boiss.                       | Caryophyllaceae  | Annual    | Therophyte      | Saharo-Arabian                        |
| <i>Scrophularia deserti</i> Delile                          | Scrophulariaceae | Perennial | Chamaephyte     | Saharo-Arabian                        |
| <i>Senecio flavus</i> (Decne.) Sch.Bip.                     | Asteraceae       | Annual    | Therophyte      | Saharo-Arabian                        |
| <i>Senecio glaucus</i> L.                                   | Asteraceae       | Annual    | Therophyte      | Irano-Turanian - Saharo-Arabian       |
| <i>Setaria verticillata</i> (L.) P.Beauv.                   | Poaceae          | Annual    | Ephemeral       | Plurireginalbor-trop                  |
| <i>Sisymbrium irio</i> L.                                   | Brassicaceae     | Annual    | Therophyte      | Med - Irano-Turanian                  |
| <i>Spergula fallax</i> (Lowe) E.H.L.Krause                  | Caryophyllaceae  | Annual    | Therophyte      | Saharo-Arabian                        |
| <i>Spergularia diandra</i> (Guss.) Heldr.                   | Caryophyllaceae  | Annual    | Therophyte      | Med - Irano-Turanian - Saharo-Arabian |

---

|                                                 |                |           |                 |                                       |
|-------------------------------------------------|----------------|-----------|-----------------|---------------------------------------|
| <i>Stipa capensis</i> Thunb.                    | Poaceae        | Annual    | Ephemeral       | Irano-Turanian - Saharo-Arabian       |
| <i>Stipagrostis plumose</i> Munro ex T.Anderson | Poaceae        | Perennial | Hemicryptophyte | Irano-Turanian - Saharo-Arabian       |
| <i>Tamarix nilotica</i> (Ehrenb.) Bunge         | Tamaricaceae   | Perennial | Phanerophyte    | Saharo-Arabian                        |
| <i>Teucrium oliverianum</i> Ging. ex Benth.     | Lamiaceae      | Annual    | Hemicryptophyte | Irano-Turanian                        |
| <i>Teucrium polium</i> L.                       | Lamiaceae      | Perennial | Chamaephyte     | Med - Irano-Turanian                  |
| <i>Trigonella hamosa</i> Del. ex Smith          | Papilionaceae  | Annual    | Therophyte      | Sudanian                              |
| <i>Trigonella stellata</i> Forssk.              | Papilionaceae  | Annual    | Therophyte      | Saharo-Arabian                        |
| <i>Typha domingensis</i> Pers.                  | Typhaceae      | Perennial | Helophyte       | Med - Irano-Turanian - Saharo-Arabian |
| <i>Xanthium strumarium</i> L.                   | Asteraceae     | Annual    | Therophyte      | Plurireginalbor-trop                  |
| <i>Zilla spinosa</i> (L.) Prantl                | Brassicaceae   | Perennial | Chamaephyte     | Saharo-Arabian                        |
| <i>Zygophyllum coccineum</i> L.                 | Zygophyllaceae | Perennial | Chamaephyte     | Saharo-Arabian                        |

---
